# Supplementary material for: Efficacy of a Guided Web-Based Self-Management Intervention for Depression or Dysthymia: Randomized Controlled Trial With a 12-Month Follow-Up Using an Active Control Condition
Source: PubMed Central journal article supplement (PMC7388040; doi:10.2196/15361), 2020-07-14
Supplement: jmir_v22i7e15361_app1.pdf [file jmir_v22i7e15361_app1.pdf]

Multimedia Appendix - Efficacy of a Guided Web-Based Self-Management Intervention for Depression or Dysthymia: Randomized Controlled Trial With a 12-Month Follow-Up Using an Active Control Condition

SCQ-8

**Table 1:** per item results of the CSQ-8, with four indicating the most positive evaluation and one the most negative.

| Item                                                                             | Mean iFD (n=135) | Mean PMR (n=130) | Wilcoxon rank sum test with continuity correction | Holm – corrected <i>p</i> -Values |
|----------------------------------------------------------------------------------|------------------|------------------|---------------------------------------------------|-----------------------------------|
| 1. How would you rate the quality of the program?                                | 3.13             | 2.97             | W = 10268, p = .002                               | .006                              |
| 2. Did the program give you the kind of support you wanted?                      | 3.08             | 2.62             | W = 11372, p<.001                                 | <.001                             |
| 3. To what extent has the program met your needs?                                | 2.79             | 2.50             | W = 10560, p = .002                               | .006                              |
| 4. Would you recommend the program to a friend if he or she needed similar help? | 3.48             | 2.93             | W = 12072, p<.001                                 | <.001                             |
| 5. How satisfied are you with the amount of help you have received here?         | 3.21             | 2.95             | W = 10126, p<.001                                 | .018                              |
| 6. Did the program help you deal more appropriately with your problems?          | 3.15             | 2.59             | W = 12370, p<.001                                 | <.001                             |
| 7. How satisfied are you with the program on the whole?                          | 3.16             | 2.7              | W = 11644, p<.001                                 | <.001                             |
| 8. Would you use the program again if you needed help again?                     | 3.32             | 2.74             | W = 11976, p<.001                                 | <.001                             |

---

*IDS-SR*

---

Base Modell

Linear mixed model fit by REML. t-tests use Satterthwaite's method ['lmerModLmerTest']

Formula: value ~ time \* Group + I(time^2) \* Group + (time | PATNO)

Data: Full data set

REML criterion at convergence: 11498.9

Scaled residuals:

|         |         |         |        |        |
|---------|---------|---------|--------|--------|
| Min     | 1Q      | Median  | 3Q     | Max    |
| -4.2187 | -0.5575 | -0.0323 | 0.5253 | 5.1349 |

Random effects:

| Groups   | Name        | Variance | Std.Dev. | Corr  |
|----------|-------------|----------|----------|-------|
| PATNO    | (Intercept) | 46.669   | 6.831    |       |
|          | time        | 1.375    | 1.173    | -0.11 |
| Residual |             | 46.950   | 6.852    |       |

Number of obs: 1615, groups: PATNO, 347

Fixed effects:

|                 | Estimate | Std. Error | df         | t value | Pr(> t )      |
|-----------------|----------|------------|------------|---------|---------------|
| (Intercept)     | 30.26650 | 1.11883    | 1157.23978 | 27.052  | < 2e-16 ***   |
| time            | -2.77169 | 0.70448    | 1196.16544 | -3.934  | 0.0000882 *** |
| Group           | 2.08141  | 1.57913    | 1151.22248 | 1.318   | 0.18774       |
| l(time^2)       | 0.16660  | 0.09987    | 1115.25168 | 1.668   | 0.09556 .     |
| time:Group      | -2.48568 | 0.98676    | 1186.24928 | -2.519  | 0.01190 *     |
| Group:l(time^2) | 0.37466  | 0.13946    | 1099.01782 | 2.686   | 0.00733 **    |

---

Signif. codes: 0 '\*\*\*' 0.001 '\*\*' 0.01 '\*' 0.05 '.' 0.1 ' ' 1

Correlation of Fixed Effects:

|             | (Intr) | time   | Group  | l(t^2) | tm:Grp |
|-------------|--------|--------|--------|--------|--------|
| time        | -0.820 |        |        |        |        |
| Group       | -0.709 | 0.581  |        |        |        |
| l(time^2)   | 0.751  | -0.966 | -0.532 |        |        |
| time:Group  | 0.585  | -0.714 | -0.820 | 0.689  |        |
| Grp:l(tm^2) | -0.538 | 0.692  | 0.751  | -0.716 | -0.966 |

>

> r.squaredGLMM(IDS.model.q)

| R2m       | R2c       |
|-----------|-----------|
| 0.0769583 | 0.5925718 |

[Base model with per-protocol sample \(finished at least 4 Workshops/downloaded 4 PMR lessons\)](#)

Linear mixed model fit by REML. t-tests use Satterthwaite's method ['lmerModLmerTest']

Formula: value ~ time \* Group + l(time^2) \* Group + (time | PATNO)

Data: Completers data set

REML criterion at convergence: 7824.4

Scaled residuals:

| Min     | 1Q      | Median  | 3Q     | Max    |
|---------|---------|---------|--------|--------|
| -3.8761 | -0.5591 | -0.0696 | 0.5204 | 4.9904 |

Random effects:

| Groups   | Name        | Variance | Std.Dev. | Corr  |
|----------|-------------|----------|----------|-------|
| PATNO    | (Intercept) | 71.226   | 8.440    |       |
|          | time        | 1.951    | 1.397    | -0.45 |
| Residual |             | 47.340   | 6.880    |       |

Number of obs: 1091, groups: PATNO, 245

Fixed effects:

|                 | Estimate | Std. Error | df        | t value | Pr(> t )    |
|-----------------|----------|------------|-----------|---------|-------------|
| (Intercept)     | 26.05511 | 2.85142    | 837.15579 | 9.138   | < 2e-16 *** |
| time            | -0.63332 | 1.51794    | 684.34875 | -0.417  | 0.67665     |
| Group           | 8.02747  | 3.84189    | 840.19684 | 2.089   | 0.03697 *   |
| l(time^2)       | -0.08779 | 0.18865    | 659.08694 | -0.465  | 0.64184     |
| time:Group      | -5.61598 | 2.04170    | 688.77720 | -2.751  | 0.00610 **  |
| Group:l(time^2) | 0.74671  | 0.25349    | 661.97821 | 2.946   | 0.00334 **  |

---

Signif. codes: 0 '\*\*\*' 0.001 '\*\*' 0.01 '\*' 0.05 '.' 0.1 ' ' 1

Correlation of Fixed Effects:

|             | (Intr) | time   | Group  | l(t^2) | tm:Grp |
|-------------|--------|--------|--------|--------|--------|
| time        | -0.945 |        |        |        |        |
| Group       | -0.742 | 0.702  |        |        |        |
| l(time^2)   | 0.902  | -0.984 | -0.669 |        |        |
| time:Group  | 0.703  | -0.743 | -0.946 | 0.732  |        |
| Grp:l(tm^2) | -0.671 | 0.733  | 0.903  | -0.744 | -0.984 |

Base model with imputed data

Linear mixed model fit by REML. t-tests use Satterthwaite's method ['lmerModLmerTest']

Formula: value ~ time \* Group + l(time^2) \* Group + (time | PATNO)

Data: Imputed data set

REML criterion at convergence: 14876.1

Scaled residuals:

| Min     | 1Q      | Median  | 3Q     | Max    |
|---------|---------|---------|--------|--------|
| -3.9845 | -0.5954 | -0.0543 | 0.5520 | 4.8244 |

Random effects:

| Groups   | Name        | Variance | Std.Dev. | Corr |
|----------|-------------|----------|----------|------|
| PATNO    | (Intercept) | 43.0171  | 6.5587   |      |
|          | time        | 0.5985   | 0.7736   | 0.08 |
| Residual |             | 52.0705  | 7.2160   |      |

Number of obs: 2082, groups: PATNO, 347

Fixed effects:

|                      | Estimate | Std. Error | df         | t value | Pr(> t )     |
|----------------------|----------|------------|------------|---------|--------------|
| (Intercept)          | 29.73103 | 1.09765    | 1324.94926 | 27.086  | < 2e-16 ***  |
| time                 | -2.42541 | 0.64289    | 1518.07527 | -3.773  | 0.000168 *** |
| Group[T.1]           | 2.03139  | 1.55456    | 1324.95297 | 1.307   | 0.191530     |
| l(time^2)            | 0.11268  | 0.08953    | 1386.00146 | 1.259   | 0.208382     |
| time:Group[T.1]      | -2.49360 | 0.91050    | 1518.07360 | -2.739  | 0.006240 **  |
| Group[T.1]:l(time^2) | 0.37111  | 0.12680    | 1386.00060 | 2.927   | 0.003481 **  |

---

Signif. codes: 0 '\*\*\*' 0.001 '\*\*' 0.01 '\*' 0.05 '.' 0.1 ' ' 1

Correlation of Fixed Effects:

|             | (Intr) | time   | Gr[T.1] | l(t^2) | t:G[T. |
|-------------|--------|--------|---------|--------|--------|
| time        | -0.823 |        |         |        |        |
| Group[T.1]  | -0.706 | 0.581  |         |        |        |
| l(time^2)   | 0.761  | -0.975 | -0.538  |        |        |
| tm:Grp[T.1] | 0.581  | -0.706 | -0.823  | 0.688  |        |
| G[T.1]:l(^2 | -0.538 | 0.688  | 0.761   | -0.706 | -0.975 |

Full model including all selected covariates

Linear mixed model fit by REML. t-tests use Satterthwaite's method ['lmerModLmerTest']

Formula: value ~ time \* Group + l(time^2) \* Group + dauer.all \* Group +  
anz.nutzung + (time | PATNO)

Data: Full data set

REML criterion at convergence: 8978.4

Scaled residuals:

Min 1Q Median 3Q Max  
-4.2553 -0.5833 -0.0268 0.5352 5.1741

Random effects:

| Groups   | Name        | Variance | Std.Dev. | Corr  |
|----------|-------------|----------|----------|-------|
| PATNO    | (Intercept) | 44.044   | 6.637    |       |
|          | time        | 1.355    | 1.164    | -0.15 |
| Residual |             | 45.573   | 6.751    |       |

Number of obs: 1269, groups: PATNO, 222

Fixed effects:

|                 | Estimate  | Std. Error | df         | t value | Pr(> t )     |
|-----------------|-----------|------------|------------|---------|--------------|
| (Intercept)     | 22.037242 | 2.513941   | 316.522038 | 8.766   | < 2e-16 ***  |
| time            | -2.210563 | 0.749064   | 940.339605 | -2.951  | 0.003245 **  |
| Group           | 7.457682  | 3.220897   | 359.008557 | 2.315   | 0.021154 *   |
| l(time^2)       | 0.098106  | 0.104840   | 864.800328 | 0.936   | 0.349650     |
| dauer.all       | 0.198055  | 0.055357   | 216.657649 | 3.578   | 0.000427 *** |
| anz.nutzung     | 0.008388  | 0.022994   | 216.270921 | 0.365   | 0.715638     |
| time:Group      | -2.974658 | 1.097675   | 941.310555 | -2.710  | 0.006851 **  |
| Group:l(time^2) | 0.430958  | 0.153534   | 863.512625 | 2.807   | 0.005114 **  |
| Group:dauer.all | -0.147595 | 0.069400   | 216.365972 | -2.127  | 0.034575 *   |

---

Signif. codes: 0 '\*\*\*' 0.001 '\*\*' 0.01 '\*' 0.05 '.' 0.1 ' ' 1

Correlation of Fixed Effects:

|             | (Intr) | time   | Group  | l(t^2) | dar.ll | anz.nt | tm:Grp | G:l(^2 |
|-------------|--------|--------|--------|--------|--------|--------|--------|--------|
| time        | -0.414 |        |        |        |        |        |        |        |
| Group       | -0.645 | 0.324  |        |        |        |        |        |        |
| l(time^2)   | 0.379  | -0.967 | -0.296 |        |        |        |        |        |
| dauer.all   | -0.760 | -0.002 | 0.605  | 0.000  |        |        |        |        |
| anz.nutzung | -0.380 | -0.002 | -0.060 | 0.001  | -0.034 |        |        |        |
| time:Group  | 0.283  | -0.682 | -0.476 | 0.660  | 0.001  | 0.000  |        |        |

```
Grp:l(tm^2)  -0.259  0.660  0.435 -0.683  0.000  0.000  -0.967
Group:dr.ll  0.598  0.001 -0.811  0.000 -0.798  0.049  -0.001  0.000
```

```
> r.squaredGLMM(IDS.model.q4)
      R2m      R2c
0.1023094  0.5956643
```

---

*SF12 – mental component score*

---

### Base model

Linear mixed model fit by REML. t-tests use Satterthwaite's method ['lmerModLmerTest']  
 Formula: value ~ time \* Group + l(time^2) \* Group + (time | PATNO)  
 Data: Full data set

REML criterion at convergence: 11366.1

#### Scaled residuals:

| Min     | 1Q      | Median  | 3Q     | Max    |
|---------|---------|---------|--------|--------|
| -2.8182 | -0.6118 | -0.0518 | 0.5837 | 3.2286 |

#### Random effects:

| Groups   | Name        | Variance | Std.Dev. | Corr  |
|----------|-------------|----------|----------|-------|
| PATNO    | (Intercept) | 42.494   | 6.519    |       |
|          | time        | 1.835    | 1.354    | -0.31 |
| Residual |             | 46.334   | 6.807    |       |

Number of obs: 1603, groups: PATNO, 346

#### Fixed effects:

|                 | Estimate | Std. Error | df         | t value | Pr(> t )     |
|-----------------|----------|------------|------------|---------|--------------|
| (Intercept)     | 32.61215 | 1.10485    | 1172.48279 | 29.517  | < 2e-16 ***  |
| time            | 0.66546  | 0.70263    | 1207.62066 | 0.947   | 0.343778     |
| Group           | -3.06440 | 1.55814    | 1168.00675 | -1.967  | 0.049455 *   |
| l(time^2)       | 0.11421  | 0.09973    | 1118.29287 | 1.145   | 0.252375     |
| time:Group      | 3.55324  | 0.98486    | 1198.38990 | 3.608   | 0.000321 *** |
| Group:l(time^2) | -0.54144 | 0.13927    | 1102.15636 | -3.888  | 0.000107 *** |

---  
 Signif. codes: 0 '\*\*\*' 0.001 '\*\*' 0.01 '\*' 0.05 '.' 0.1 ' ' 1

#### Correlation of Fixed Effects:

|             | (Intr) | time   | Group  | l(t^2) | tm:Grp |
|-------------|--------|--------|--------|--------|--------|
| time        | -0.838 |        |        |        |        |
| Group       | -0.709 | 0.594  |        |        |        |
| l(time^2)   | 0.755  | -0.962 | -0.536 |        |        |
| time:Group  | 0.598  | -0.713 | -0.838 | 0.687  |        |
| Grp:l(tm^2) | -0.541 | 0.689  | 0.756  | -0.716 | -0.963 |

```
> r.squaredGLMM(SF.model.q)
      R2m      R2c
0.06428885  0.5475976
```

### Full model including all selected covariates

Linear mixed model fit by REML. t-tests use Satterthwaite's method ['lmerModLmerTest']

Formula: value ~ time \* Group + I(time^2) \* Group + dauer.all + anz.nutzung + (time | PATNO)

Data: Full data set

REML criterion at convergence: 8983.3

Scaled residuals:

| Min     | 1Q      | Median  | 3Q     | Max    |
|---------|---------|---------|--------|--------|
| -2.8117 | -0.6064 | -0.0462 | 0.5816 | 3.2107 |

Random effects:

| Groups   | Name        | Variance | Std.Dev. | Corr  |
|----------|-------------|----------|----------|-------|
| PATNO    | (Intercept) | 47.947   | 6.924    |       |
|          | time        | 1.886    | 1.373    | -0.37 |
| Residual |             | 46.222   | 6.799    |       |

Number of obs: 1267, groups: PATNO, 222

Fixed effects:

|                 | Estimate  | Std. Error | df         | t value | Pr(> t )     |
|-----------------|-----------|------------|------------|---------|--------------|
| (Intercept)     | 34.437164 | 1.979824   | 428.591283 | 17.394  | < 2e-16 ***  |
| time            | 0.272576  | 0.758201   | 944.910799 | 0.360   | 0.719298     |
| Group           | -2.344910 | 1.913250   | 776.676640 | -1.226  | 0.220715     |
| I(time^2)       | 0.163336  | 0.105863   | 858.954157 | 1.543   | 0.123221     |
| dauer.all       | -0.023962 | 0.031988   | 217.383707 | -0.749  | 0.454601     |
| anz.nutzung     | -0.002428 | 0.022046   | 217.723747 | -0.110  | 0.912410     |
| time:Group      | 3.531149  | 1.110551   | 945.733376 | 3.180   | 0.001523 **  |
| Group:I(time^2) | -0.529251 | 0.154889   | 856.811993 | -3.417  | 0.000663 *** |

---

Signif. codes: 0 '\*\*\*' 0.001 '\*\*' 0.01 '\*' 0.05 '.' 0.1 ' ' 1

Correlation of Fixed Effects:

|             | (Intr) | time   | Group  | I(t^2) | dar.ll | anz.nt | tm:Grp |
|-------------|--------|--------|--------|--------|--------|--------|--------|
| time        |        | -0.542 |        |        |        |        |        |
| Group       |        |        | -0.363 | 0.563  |        |        |        |
| I(time^2)   |        |        |        | 0.485  | -0.963 | -0.503 |        |
| dauer.all   |        |        |        |        | -0.572 | -0.001 | -0.113 |
| anz.nutzung |        |        |        |        |        | 0.002  | 0.009  |
| time:Group  |        |        |        |        |        |        | 0.370  |
| Grp:I(tm^2) |        |        |        |        |        |        |        |

>

r.squaredGLMM(SF.model.q1)

| R2m        | R2c       |
|------------|-----------|
| 0.06368429 | 0.5570092 |

---

SF12 – physical component score

---

Base model

Linear mixed model fit by REML. t-tests use Satterthwaite's method ['lmerModLmerTest']

Formula: value ~ time \* Group + I(time^2) \* Group + (time | PATNO)

Data: Full data set

REML criterion at convergence: 10976.1

Scaled residuals:

| Min     | 1Q      | Median | 3Q     | Max    |
|---------|---------|--------|--------|--------|
| -3.5580 | -0.5436 | 0.0960 | 0.5657 | 2.9353 |

Random effects:

| Groups   | Name        | Variance | Std.Dev. | Corr  |
|----------|-------------|----------|----------|-------|
| PATNO    | (Intercept) | 67.554   | 8.219    |       |
|          | time        | 1.013    | 1.007    | -0.47 |
| Residual |             | 33.232   | 5.765    |       |

Number of obs: 1603, groups: PATNO, 346

Fixed effects:

|                 | Estimate | Std. Error | df         | t value | Pr(> t )   |
|-----------------|----------|------------|------------|---------|------------|
| (Intercept)     | 46.77916 | 1.04449    | 950.43320  | 44.787  | <2e-16 *** |
| time            | 0.34697  | 0.59639    | 1168.46857 | 0.582   | 0.561      |
| Group           | -0.90657 | 1.47375    | 945.62285  | -0.615  | 0.539      |
| I(time^2)       | -0.05953 | 0.08475    | 1088.81903 | -0.702  | 0.483      |
| time:Group      | 0.79370  | 0.83543    | 1161.16700 | 0.950   | 0.342      |
| Group:I(time^2) | -0.07321 | 0.11832    | 1074.95813 | -0.619  | 0.536      |

---

Signif. codes: 0 '\*\*\*' 0.001 '\*\*' 0.01 '\*' 0.05 '.' 0.1 ' ' 1

Correlation of Fixed Effects:

|             | (Intr) | time   | Group  | I(t^2) | tm:Grp |
|-------------|--------|--------|--------|--------|--------|
| time        | -0.770 |        |        |        |        |
| Group       | -0.709 | 0.546  |        |        |        |
| I(time^2)   | 0.678  | -0.967 | -0.481 |        |        |
| time:Group  | 0.550  | -0.714 | -0.770 | 0.690  |        |
| Grp:I(tm^2) | -0.486 | 0.692  | 0.678  | -0.716 | -0.967 |

Full model including all selected covariates

Linear mixed model fit by REML. t-tests use Satterthwaite's method ['lmerModLmerTest']

Formula: value ~ time \* Group + I(time^2) \* Group + dauer.all + anz.nutzung + (time | PATNO)

Data: Full data set

REML criterion at convergence: 8650.2

Scaled residuals:

| Min     | 1Q      | Median | 3Q     | Max    |
|---------|---------|--------|--------|--------|
| -3.5766 | -0.5713 | 0.1061 | 0.5742 | 2.9656 |

Random effects:

| Groups   | Name        | Variance | Std.Dev. | Corr  |
|----------|-------------|----------|----------|-------|
| PATNO    | (Intercept) | 71.1493  | 8.4350   |       |
|          | time        | 0.9077   | 0.9527   | -0.46 |
| Residual |             | 33.3499  | 5.7749   |       |

Number of obs: 1267, groups: PATNO, 222

Fixed effects:

|                 | Estimate | Std. Error | df        | t value | Pr(> t )   |
|-----------------|----------|------------|-----------|---------|------------|
| (Intercept)     | 49.53477 | 2.04638    | 353.32171 | 24.206  | <2e-16 *** |
| time            | 0.53402  | 0.64061    | 931.45018 | 0.834   | 0.4047     |
| Group           | -1.18492 | 1.82365    | 598.34750 | -0.650  | 0.5161     |
| l(time^2)       | -0.07972 | 0.08974    | 856.98147 | -0.888  | 0.3746     |
| dauer.all       | -0.07744 | 0.03489    | 216.17467 | -2.219  | 0.0275 *   |
| anz.nutzung     | -0.02059 | 0.04814    | 217.33693 | -0.428  | 0.6694     |
| time:Group      | 0.83717  | 0.93824    | 932.52332 | 0.892   | 0.3725     |
| Group:l(time^2) | -0.07504 | 0.13132    | 855.41591 | -0.571  | 0.5679     |

---

Signif. codes: 0 '\*\*\*' 0.001 '\*\*' 0.01 '\*' 0.05 '.' 0.1 ' ' 1

Correlation of Fixed Effects:

|             | (Intr) | time   | Group  | l(t^2) | dar.ll | anz.nt | tm:Grp |
|-------------|--------|--------|--------|--------|--------|--------|--------|
| time        | -0.454 |        |        |        |        |        |        |
| Group       | -0.310 | 0.512  |        |        |        |        |        |
| l(time^2)   | 0.398  | -0.968 | -0.448 |        |        |        |        |
| dauer.all   | -0.604 | -0.001 | -0.130 | 0.000  |        |        |        |
| anz.nutzung | -0.528 | -0.003 | -0.037 | 0.002  | 0.009  |        |        |
| time:Group  | 0.310  | -0.683 | -0.751 | 0.661  | 0.003  | 0.000  |        |
| Grp:l(tm^2) | -0.271 | 0.662  | 0.658  | -0.683 | -0.003 | 0.001  | -0.968 |
